# Supplementary material
Source: PubMed Central journal article supplement (PMC4294228)
Supplement: IAI.02398-14_zii999091073so1.pdf [file IAI.02398-14_zii999091073so1.pdf]

| Antigens         | Antibody | Prevalence of responses (%) <sup>b</sup> |
|------------------|----------|------------------------------------------|
| <b>MSP1-19</b>   | IgG      | 48.6                                     |
|                  | IgG1     | 33.9                                     |
|                  | IgG3     | 43.2                                     |
|                  | IgM      | 45.4                                     |
| <b>MSP2 3D7</b>  | IgG      | 43.7                                     |
|                  | IgG1     | 45.6                                     |
|                  | IgG3     | 44.5                                     |
|                  | IgM      | 41                                       |
| <b>MSP2 FC27</b> | IgG      | 61.2                                     |
|                  | IgG1     | 48.1                                     |
|                  | IgG3     | 60.7                                     |
|                  | IgM      | 63.4                                     |
| <b>AMA-1</b>     | IgG      | 57.9                                     |
|                  | IgG1     | 63.9                                     |
|                  | IgG3     | 42.6                                     |
|                  | IgM      | 31.2                                     |

**Supplementary Data Table 1: Seroprevalence of merozoite antigen responses<sup>a</sup>**

<sup>a</sup> Seroprevalence was determined by ELISA.

<sup>b</sup> The threshold for positivity was determined as the mean +3 S.D. of negative control plasma.

Each value represents % positive of 183 samples.

| Antigens  |          | Correlation Coefficient <sup>a</sup> |        |          |      |           |      |         |     |
|-----------|----------|--------------------------------------|--------|----------|------|-----------|------|---------|-----|
|           |          | MSP1-19                              |        | MSP2 3D7 |      | MSP2 FC27 |      | AMA-1   |     |
|           | Antibody | IgG                                  | IgM    | IgG      | IgM  | IgG       | IgM  | IgG     | IgM |
| MSP1-19   | IgG      |                                      |        |          |      |           |      |         |     |
|           | IgM      | 0.17*                                |        |          |      |           |      |         |     |
| MSP2 3D7  | IgG      | 0.51                                 | 0.07** |          |      |           |      |         |     |
|           | IgM      | 0.41                                 | 0.51   | 0.50     |      |           |      |         |     |
| MSP2 FC27 | IgG      | 0.52                                 | 0.09** | 0.73     | 0.41 |           |      |         |     |
|           | IgM      | 0.38                                 | 0.50   | 0.42     | 0.65 | 0.55      |      |         |     |
| AMA-1     | IgG      | 0.54                                 | 0.03** | 0.67     | 0.44 | 0.72      | 0.48 |         |     |
|           | IgM      | 0.06**                               | 0.76   | -0.04**  | 0.39 | -0.08**   | 0.37 | -0.05** |     |

**Supplementary Data Table 2: Correlation between IgG and IgM responses to merozoite antigens of *P. falciparum***

<sup>a</sup> Correlation coefficients were determined by Spearman's method. All correlations are significant at a value of  $p < 0.001$ , unless otherwise indicated. \*  $p < 0.05$  \*\*  $p > 0.1$

|                 | IRR <sup>b</sup> | (95%CI)             | <i>P</i>         | All <i>P. falciparum</i> episodes |                     |              | <i>P</i> | aIRR-FOI <sup>d</sup> | (95%CI) | <i>P</i> |
|-----------------|------------------|---------------------|------------------|-----------------------------------|---------------------|--------------|----------|-----------------------|---------|----------|
|                 |                  |                     |                  | aIRR <sup>c</sup>                 | (95%CI)             |              |          |                       |         |          |
| <b>MSP1-19</b>  |                  |                     |                  |                                   |                     |              |          |                       |         |          |
| IgG (M)         | <b>1.38</b>      | <b>(1.04, 1.82)</b> | <b>0.025</b>     | 1.13                              | (0.85, 1.51)        | 0.392        | 1.04     | (0.84, 1.29)          | 0.719   |          |
| IgG (H)         | 1.18             | (0.89, 1.56)        | 0.261            | 1.06                              | (0.82, 1.37)        | 0.682        | 0.98     | (0.79, 1.22)          | 0.854   |          |
| IgG1 (M)        | 1.18             | (0.90, 1.54)        | 0.227            | 1.14                              | (0.87, 1.48)        | 0.341        | 1.01     | (0.82, 1.24)          | 0.95    |          |
| IgG1 (H)        | 0.85             | (0.64, 1.13)        | 0.254            | 0.88                              | (0.69, 1.13)        | 0.308        | 0.86     | (0.69, 1.08)          | 0.19    |          |
| IgG3 (M)        | 1.14             | (0.86, 1.51)        | 0.352            | 1.16                              | (0.90, 1.49)        | 0.254        | 1.04     | (0.84, 1.29)          | 0.729   |          |
| IgG3 (H)        | 1.14             | (0.87, 1.48)        | 0.337            | 1.17                              | (0.89, 1.54)        | 0.268        | 0.92     | (0.74, 1.14)          | 0.465   |          |
| IgM (M)         | 0.96             | (0.75, 1.24)        | 0.775            | 0.95                              | (0.75, 1.22)        | 0.704        | 1.04     | (0.84, 1.28)          | 0.746   |          |
| IgM (H)         | 0.90             | (0.68, 1.19)        | 0.476            | 0.87                              | (0.65, 1.16)        | 0.349        | 0.96     | (0.78, 1.19)          | 0.702   |          |
| <b>MSP2 3D7</b> |                  |                     |                  |                                   |                     |              |          |                       |         |          |
| IgG (M)         | 1.29             | (0.95, 1.75)        | 0.098            | 1.14                              | (0.84, 1.53)        | 0.397        | 1.20     | (0.95, 1.52)          | 0.127   |          |
| IgG (H)         | <b>1.74</b>      | <b>(1.34, 2.25)</b> | <b>&lt;0.001</b> | 1.21                              | (0.88, 1.67)        | 0.237        | 1.17     | (0.93, 1.47)          | 0.185   |          |
| IgG1 (M)        | 1.19             | (0.87, 1.62)        | 0.273            | 1.08                              | (0.78, 1.49)        | 0.659        | 1.08     | (0.85, 1.37)          | 0.512   |          |
| IgG1 (H)        | <b>1.72</b>      | <b>(1.30, 2.26)</b> | <b>&lt;0.001</b> | 1.22                              | (0.86, 1.74)        | 0.269        | 1.11     | (0.88, 1.40)          | 0.368   |          |
| IgG3 (M)        | <b>1.49</b>      | <b>(1.11, 2.01)</b> | <b>0.008</b>     | <b>1.45</b>                       | <b>(1.08, 1.94)</b> | <b>0.014</b> | 1.17     | (0.93, 1.48)          | 0.182   |          |
| IgG3 (H)        | <b>1.98</b>      | <b>(1.52, 2.59)</b> | <b>&lt;0.001</b> | 1.36                              | (0.97, 1.90)        | 0.076        | 1.18     | (0.94, 1.48)          | 0.150   |          |
| IgM (M)         | 0.90             | (0.67, 1.19)        | 0.448            | 0.80                              | (0.61, 1.05)        | 0.103        | 0.94     | (0.75, 1.19)          | 0.623   |          |
| IgM (H)         | 1.28             | (0.99, 1.65)        | 0.056            | 1.05                              | (0.81, 1.37)        | 0.695        | 1.09     | (0.88, 1.34)          | 0.425   |          |

**MSP2 FC27**

|                      |             |                     |                  |             |                     |                  |             |                     |              |
|----------------------|-------------|---------------------|------------------|-------------|---------------------|------------------|-------------|---------------------|--------------|
| IgG (M)              | <b>1.51</b> | <b>(1.11, 2.06)</b> | <b>0.008</b>     | <b>1.37</b> | <b>(1.02, 1.84)</b> | <b>0.038</b>     | <b>1.29</b> | <b>(1.01, 1.65)</b> | <b>0.039</b> |
| IgG (H)              | <b>1.99</b> | <b>(1.52, 2.62)</b> | <b>&lt;0.001</b> | <b>1.46</b> | <b>(1.04, 2.06)</b> | <b>0.029</b>     | <b>1.29</b> | <b>(1.00, 1.65)</b> | <b>0.046</b> |
| IgG1 (M)             | <b>1.66</b> | <b>(1.23, 2.25)</b> | <b>0.001</b>     | <b>1.38</b> | <b>(1.00, 1.91)</b> | <b>0.049</b>     | <b>1.32</b> | <b>(1.03, 1.69)</b> | <b>0.026</b> |
| IgG1 (H)             | <b>2.25</b> | <b>(1.72, 2.95)</b> | <b>&lt;0.001</b> | <b>1.74</b> | <b>(1.28, 2.37)</b> | <b>&lt;0.001</b> | <b>1.40</b> | <b>(1.10, 1.79)</b> | <b>0.007</b> |
| IgG3 (M)             | <b>1.67</b> | <b>(1.23, 2.26)</b> | <b>0.001</b>     | <b>1.55</b> | <b>(1.15, 2.08)</b> | <b>0.004</b>     | <b>1.42</b> | <b>(1.13, 1.80)</b> | <b>0.003</b> |
| IgG3 (H)             | <b>2.23</b> | <b>(1.69, 2.94)</b> | <b>&lt;0.001</b> | <b>1.62</b> | <b>(1.15, 2.28)</b> | <b>0.006</b>     | <b>1.40</b> | <b>(1.08, 1.81)</b> | <b>0.011</b> |
| IgM (M)              | 0.92        | (0.69, 1.23)        | 0.594            | 1.28        | (0.71, 2.31)        | 0.407            | 0.94        | (0.76, 1.16)        | 0.567        |
| IgM (H)              | <b>1.36</b> | <b>(1.06, 1.75)</b> | <b>0.016</b>     | <b>1.94</b> | <b>(1.12, 3.36)</b> | <b>0.018</b>     | 1.04        | (0.84, 1.28)        | 0.725        |
| <b>AMA-1</b>         |             |                     |                  |             |                     |                  |             |                     |              |
| IgG (M)              | <b>1.58</b> | <b>(1.18, 2.11)</b> | <b>0.002</b>     | <b>1.39</b> | <b>(1.05, 1.84)</b> | <b>0.022</b>     | <b>1.36</b> | <b>(1.07, 1.73)</b> | <b>0.013</b> |
| IgG (H)              | <b>2.22</b> | <b>(1.67, 2.94)</b> | <b>&lt;0.001</b> | <b>1.58</b> | <b>(1.09, 2.30)</b> | <b>0.017</b>     | <b>1.38</b> | <b>(1.07, 1.78)</b> | <b>0.012</b> |
| IgG1(M)              | 1.15        | (0.87, 1.53)        | 0.326            | 1.13        | (0.86, 1.49)        | 0.373            | 1.07        | (0.85, 1.36)        | 0.562        |
| IgG1 (H)             | <b>1.76</b> | <b>(1.37, 2.26)</b> | <b>&lt;0.001</b> | 1.29        | (0.96, 1.73)        | 0.091            | 1.18        | (0.95, 1.47)        | 0.130        |
| IgG3 (M)             | <b>1.39</b> | <b>(1.03, 1.86)</b> | <b>0.03</b>      | <b>1.36</b> | <b>(1.03, 1.81)</b> | <b>0.033</b>     | <b>1.28</b> | <b>(1.01, 1.61)</b> | <b>0.039</b> |
| IgG3 (H)             | <b>2.11</b> | <b>(1.63, 2.72)</b> | <b>&lt;0.001</b> | <b>1.67</b> | <b>(1.20, 2.31)</b> | <b>0.002</b>     | <b>1.38</b> | <b>(1.10, 1.74)</b> | <b>0.005</b> |
| IgM (M)              | 0.93        | (0.73, 1.20)        | 0.597            | 1.02        | (0.79, 1.31)        | 0.902            | 0.98        | (0.80, 1.21)        | 0.884        |
| IgM (H)              | 0.81        | (0.61, 1.07)        | 0.145            | 0.86        | (0.66, 1.11)        | 0.241            | 0.95        | (0.76, 1.19)        | 0.650        |
| All (H) <sup>e</sup> | <b>1.47</b> | <b>(1.10, 1.95)</b> | <b>0.009</b>     | 1.22        | (0.89, 1.67)        | 0.217            | 1.19        | (0.91, 1.55)        | 0.209        |

**Supplementary Data Table 3: Antibody responses to *P. falciparum* merozoite antigens and prospective risk of *P. falciparum* infection (any density)<sup>a</sup>**

<sup>a</sup> Antibody levels were grouped into tertiles and related to prospective incidence of *P.*

*falciparum* malaria infection (any density). High antibody responders (designated H) or medium antibody responders (designated M) were compared to low responders for each antigen.

<sup>b</sup> Values represent Incidence Rate Ratios +/- Confidence Intervals (IRR).

<sup>c</sup> Adjustments were performed for the variables of village (11 categories), month (6 categories), year (continuous), age (continuous), *P. falciparum* infection status at the start of the interval (0,1), prior drug use (2 categories) and average ITN use (continuous) as defined previously (aIRR)(1).

<sup>d</sup> Adjustments were performed to account only for differences in exposure as defined previously (aIRR-FOI)(2).

<sup>e</sup> Prospective risk of malaria during the study follow up period was examined in 16 individuals who were high responders for all antigens and compared with the rest of the cohort.

## REFERENCES

1. **Lin, E., B. Kiniboro, L. Gray, S. Dobbie, L. Robinson, A. Laumea, S. Schoepflin, D. Stanisic, I. Betuela, P. Siba, I. Felger, L. Schofield, P. Zimmerman, and I. Mueller.** 2010. Differential patterns of infection and disease with *P. falciparum* and *P. vivax* in young Papua New Guinean children. Plos One **5**:e9047.
2. **Mueller, I., S. Schoepflin, T. A. Smith, K. L. Benton, M. T. Bretscher, E. Lin, B. Kiniboro, P. A. Zimmerman, T. P. Speed, P. Siba, and I. Felger.** 2012. Force of infection is key to understanding the epidemiology of *Plasmodium falciparum* malaria in Papua New Guinean children. Proceedings of the National Academy of Sciences of the United States of America **109**:10030-10035.
